# Supplementary material for: Real‐life treatment of cutaneous warts with cantharidin podophyllin salicylic acid solution
Source: PubMed Central journal article supplement (PMC6916542; doi:10.1111/dth.13143), 2019-11-20
Supplement: DTH-32-na-s001.pdf [file DTH-32-na-s001.pdf]

**SUPPLEMENTARY TABLE**

**Patient characteristics**

|                                                           | Children<br>(age < 18) | Adults<br>(age ≥ 18) | Total      | <i>P</i> value |
|-----------------------------------------------------------|------------------------|----------------------|------------|----------------|
| <b>Sex~</b>                                               | n = 52                 | n = 83               | n = 135    | 0.4            |
| Female                                                    | 25 (48.1)              | 47 (56.6)            | 72 (53.3)  |                |
| <b>Number of warts~</b>                                   | n = 50                 | n = 83               | n = 133    | 0.3            |
| 1                                                         | 14 (28.0)              | 27 (32.5)            | 41 (30.8)  |                |
| 2-5                                                       | 19 (38.0)              | 38 (45.8)            | 57 (42.9)  |                |
| > 5                                                       | 17 (34.0)              | 18 (21.7)            | 35 (26.3)  |                |
| <b>Number of anatomic sites involved~</b>                 | n = 52                 | n = 83               | n = 135    | < 0.01*        |
| 1                                                         | 31 (59.6)              | 70 (84.3)            | 101 (74.8) |                |
| ≥ 2                                                       | 21 (40.4)              | 13 (15.7)            | 34 (25.2)  |                |
| <b>Location of warts~^</b>                                |                        |                      |            | NC             |
| Common warts                                              | 47 (90.4)              | 38 (45.8)            | 85 (63.0)  |                |
| Plantar warts                                             | 23 (44.2)              | 51 (61.4)            | 74 (54.8)  |                |
| Peri-ungual warts                                         | 9 (17.3)               | 10 (12.0)            | 19 (14.1)  |                |
| Other                                                     | 3 (5.8)                | 0 (0.0)              | 3 (2.2)    |                |
| <b>Duration of warts#</b>                                 | n = 50                 | n = 81               | n = 131    | < 0.01*        |
| ≤ 6 months                                                | 8 (16.0)               | 13 (16.0)            | 21 (16.0)  |                |
| 6-12 months                                               | 15 (30.0)              | 6 (7.4)              | 21 (16.0)  |                |
| 12-24 months                                              | 14 (28.0)              | 21 (25.9)            | 35 (26.7)  |                |
| > 24 months                                               | 13 (26.0)              | 41 (50.6)            | 54 (41.2)  |                |
| <b>Number of reasons for desiring treatment of warts#</b> | n = 51                 | n = 83               | n = 134    | 0.05           |
| 1                                                         | 13 (25.5)              | 38 (45.8)            | 51 (38.1)  |                |
| 2                                                         | 29 (56.9)              | 32 (38.5)            | 61 (45.5)  |                |
| ≥ 3                                                       | 9 (17.6)               | 13 (15.7)            | 22 (16.4)  |                |
| <b>Reason for desiring treatment of warts#^</b>           |                        |                      |            | NC             |
| Pain                                                      | 19 (37.3)              | 48 (57.8)            | 67 (50.0)  |                |
| Discomfort                                                | 31 (60.8)              | 59 (71.1)            | 90 (67.2)  |                |
| Social inconvenience                                      | 21 (41.2)              | 14 (16.9)            | 35 (26.1)  |                |
| Cosmetic inconvenience                                    | 25 (49.0)              | 21 (25.3)            | 46 (34.3)  |                |
| Other                                                     | 3 (5.9)                | 3 (3.6)              | 6 (4.5)    |                |
| <b>Number of previous treatments#</b>                     | n = 52                 | n = 83               | n = 135    | 0.6            |
| 0-1                                                       | 19 (36.5)              | 26 (31.3)            | 45 (33.3)  |                |
| ≥ 2                                                       | 33 (63.5)              | 57 (68.7)            | 90 (66.7)  |                |
| <b>Previous treatments of the warts#^</b>                 |                        |                      |            | NC             |
| Salicylic acid                                            | 13 (25.0)              | 24 (28.9)            | 37 (27.4)  |                |
| Ditranol salicylic acid                                   | 24 (46.2)              | 35 (42.2)            | 59 (43.7)  |                |
| Cryotherapy                                               | 43 (82.7)              | 72 (86.7)            | 115 (85.2) |                |
| Other                                                     | 13 (25.0)              | 35 (42.2)            | 48 (35.6)  |                |
| <b>Concurrent treatments of the warts~</b>                | n = 52                 | n = 83               | n = 135    | 0.3            |
| No                                                        | 48 (92.3)              | 71 (85.5)            | 119 (88.1) |                |
| Yes (1 or 2 treatments)                                   | 4 (7.7)                | 12 (14.5)            | 16 (11.9)  |                |
| <b>Concurrent treatments of the warts~^</b>               |                        |                      |            | NC             |
| Salicylic acid                                            | 1 (1.9)                | 2 (2.4)              | 3 (2.2)    |                |
| Ditranol salicylic acid                                   | 1 (1.9)                | 8 (9.6)              | 9 (6.7)    |                |
| Cryotherapy                                               | 2 (3.8)                | 3 (3.6)              | 5 (3.7)    |                |
| Other                                                     | 0 (0.0)                | 1 (1.2)              | 1 (0.7)    |                |
| <b>Treatments after CPS1 solution#</b>                    | n = 51                 | n = 83               | n = 134    | 0.2            |
| No                                                        | 41 (80.4)              | 58 (69.9)            | 99 (73.9)  |                |
| Yes (1-3 treatments)                                      | 10 (19.6)              | 25 (30.1)            | 35 (26.1)  |                |
| <b>Other treatment of the warts after CPS1 solution#^</b> |                        |                      |            | NC             |
| Salicylic acid                                            | 1 (2.0)                | 1 (1.2)              | 2 (1.5)    |                |
| Ditranol salicylic acid                                   | 3 (5.9)                | 13 (15.7)            | 16 (11.9)  |                |
| Cryotherapy                                               | 4 (7.8)                | 12 (14.4)            | 16 (11.9)  |                |
| Other                                                     | 2 (3.9)                | 9 (10.8)             | 11 (8.2)   |                |

Data are n (%). Abbreviations: CPS1, Cantharidin 1% podophyllin 2% salicylic acid 30%; n, Total number of patients; NC, Not calculable due to multiple answer options; ~, data obtained from patients' electronic record; #, data obtained from patients' electronic record and survey; ^, Multiple answers are possible; \*, *P* value < 0.05
